# Supplementary material
Source: PubMed Central journal article supplement (PMC5358009)
Supplement: NIHMS848705-supplement-supplement.pdf [file NIHMS848705-supplement-supplement.pdf]

Potentially Missed Diagnosis of Ischemic Stroke in the Emergency Department in the Greater Cincinnati/Northern Kentucky Stroke Study

Data Supplement S1

Tissue plasminogen activator (tPA) exclusion criteria, standard<sup>1</sup>

- Arrival > 3 hours
- Minor symptoms (NIHSS<5)
- SBP>185 mmHG or DBP>110 mmHg
- Stroke/head trauma in previous 3 months
- INR>1.7
- aPTT > 40s
- Seizure at presentation
- Major surgery within 14 days
- Previous ICH
- Aneurysm
- Platelets < 100,000
- MI within previous 3 months
- GI/ Urinary tract hemorrhage in previous 21 days
- Serum glucose <50 mg/dL
- Brain tumor
- AVM
- Active bleeding/ acute trauma
- Noncompressible arterial puncture within 7 days

Tissue plasminogen activator (tPA) eligibility criteria, ECASS<sup>2</sup>

- Arrival > 4.5 hours
- Age > 80 years old
- History of DM and prior stroke
- Any oral anticoagulant use or heparin use with aPTT > 40
- NIHSS>25

REFERENCES

1. Jauch EC, Saver JL, Adams HP, Jr., et al. Guidelines for the early management of patients with acute ischemic stroke: a guideline for healthcare professionals from the American Heart Association/American Stroke Association. *Stroke; a journal of cerebral circulation* 2013;44:870-947.
2. Hacke W, Kaste M, Bluhmki E, et al. Thrombolysis with alteplase 3 to 4.5 hours after acute ischemic stroke. *The New England journal of medicine* 2008;359:1317-29.
